# Supplementary material for: Predominant Rab-GTPase amplicons contributing to oral squamous cell carcinoma progression to metastasis
Source: PubMed Central journal article supplement (PMC4673138; doi:10.18632/oncotarget.4277), 2015-06-15
Supplement: oncotarget-06-21950-s001.pdf [file oncotarget-06-21950-s001.pdf]

## SUPPLEMENTARY TABLES

**Supplementary Table S1: PCR primer set sequences and location of the genes selected for qRT-PCR quantification**

| Gene symbol  | Foward primer (5'-3')   | Reverse primer (5'-3') | Cytogenetic band |
|--------------|-------------------------|------------------------|------------------|
| <i>RAB5</i>  | TTAGAAAAGCAGCCCCAATG    | GTACTTCTGGGAGAGTCCGC   | 3p24-p22         |
| <i>RAB7</i>  | CCTTCAGCAACACTTTCTTCCT  | CCGTTTAGTCTCCTCCTCGG   | 3q21.3           |
| <i>RAB11</i> | GCTCGGCCTCGACAAGTTC     | ACTTATACCACTGCGTCTTCCT | 8p11.22          |
| <i>GAPDH</i> | AATGAAGGGGTCATTGATGG    | AAGGTGAAGGTCGGAGTCAA   | 12p13            |
| <i>ACTB</i>  | GCACCCAGCACAATGAAG      | CTTGCTGATCCACATCTGC    | 7p22             |
| <i>HPRT1</i> | GAACGTCTTGCTCGAGATGTGA  | TCCAGCAGGTCAGCAAAGAAT  | Xq26.1           |
| <i>BCRP</i>  | CCTTCGACGTCAATAACAAGGAT | CCTGCGATGGCGTTCAC      | 4q22             |

**Supplementary Table S2: Identification of genes in frequently gained/amplified chromosome regions of RAB5 (Chromosome 3 - Cytoband p24.3-p11.1) in metastatic oral squamous cell carcinoma**

| Chromosome 3 Cytoband<br>p24.3-p11.1 | Gene Name                                                                                                                                                                                                    |
|--------------------------------------|--------------------------------------------------------------------------------------------------------------------------------------------------------------------------------------------------------------|
| <i>AZI2</i>                          | 5-azacytidine induced 2                                                                                                                                                                                      |
| <i>CMC1</i>                          | COX assembly mitochondrial protein homolog (S. cerevisiae)                                                                                                                                                   |
| <i>DAZL</i>                          | deleted in azoospermia-like                                                                                                                                                                                  |
| <i>DPH3</i>                          | DPH3, KTI11 homolog (S. cerevisiae); DPH3B, KTI11 homolog B (S. cerevisiae)                                                                                                                                  |
| <i>EFHB</i>                          | EF-hand domain family, member B                                                                                                                                                                              |
| <i>EOMES</i>                         | omesodermin homolog (Xenopus laevis)                                                                                                                                                                         |
| <i>GADL1</i>                         | glutamate decarboxylase-like 1                                                                                                                                                                               |
| <i>KAT2B</i>                         | K(lysine) acetyltransferase 2B                                                                                                                                                                               |
| <i>KCNH8</i>                         | potassium voltage-gated channel, subfamily H (eag-related), member 8                                                                                                                                         |
| <i>LOC152024</i>                     | hypothetical LOC152024                                                                                                                                                                                       |
| <i>LRRC3B</i>                        | leucine rich repeat containing 3B                                                                                                                                                                            |
| <i>NEK10</i>                         | NIMA (never in mitosis gene a)- related kinase 10                                                                                                                                                            |
| <i>NGLY1</i>                         | N-glycanase 1                                                                                                                                                                                                |
| <i>NKIRASI</i>                       | NFKB inhibitor interacting Ras-like 1                                                                                                                                                                        |
| <i>NR1D2</i>                         | nuclear receptor subfamily 1, group D, member 2                                                                                                                                                              |
| <i>OXNAD1</i>                        | oxidoreductase NAD-binding domain containing 1                                                                                                                                                               |
| <i>OXSM</i>                          | 3-oxoacyl-ACP synthase, mitochondrial                                                                                                                                                                        |
| <i>PLCL2</i>                         | phospholipase C-like 2                                                                                                                                                                                       |
| <b><i>RAB5A</i></b>                  | <b>RAB5A, member RAS oncogene family</b>                                                                                                                                                                     |
| <i>RARB</i>                          | retinoic acid receptor, beta                                                                                                                                                                                 |
| <i>RBMS3</i>                         | RNA binding motif, single stranded interacting protein                                                                                                                                                       |
| <i>RFTN1</i>                         | raftlin, lipid raft linker 1                                                                                                                                                                                 |
| <i>RPL15</i>                         | ribosomal protein L15 pseudogene 22; ribosomal protein L15 pseudogene 18; ribosomal protein L15 pseudogene 17; ribosomal protein L15 pseudogene 3; ribosomal protein L15 pseudogene 7; ribosomal protein L15 |
| <i>SATB1</i>                         | SATB homeobox 1                                                                                                                                                                                              |
| <i>SGOL1</i>                         | shugoshin-like 1 (S. pombe)                                                                                                                                                                                  |
| <i>SLC4A7</i>                        | solute carrier family 4, sodium bicarbonate cotransporter, member 7                                                                                                                                          |
| <i>STT3B</i>                         | STT3, subunit of the oligosaccharyltransferase complex, homolog B (S. cerevisiae)                                                                                                                            |
| <i>TBC1D5</i>                        | TBC1 domain family, member 5                                                                                                                                                                                 |
| <i>TGFBR2</i>                        | transforming growth factor, beta receptor II (70/80kDa)                                                                                                                                                      |
| <i>THRB</i>                          | thyroid hormone receptor, beta (erythroblastic leukemia viral (v-erb-a) oncogene homolog 2, avian)                                                                                                           |
| <i>TOP2B</i>                         | topoisomerase (DNA) II beta 180kDa                                                                                                                                                                           |
| <i>UBE2E1</i>                        | ubiquitin-conjugating enzyme E2E 1 (UBC4/5 homolog, yeast)                                                                                                                                                   |
| <i>UBE2E2</i>                        | ubiquitin-conjugating enzyme E2E 2 (UBC4/5 homolog, yeast)                                                                                                                                                   |
| <i>VENTXP7</i>                       | VENT homeobox (Xenopus laevis) pseudogene 7                                                                                                                                                                  |
| <i>ZCWPW2</i>                        | zinc finger, CW type with PWWP domain 2                                                                                                                                                                      |
| <i>ZNF385D</i>                       | zinc finger protein 385D                                                                                                                                                                                     |

**Supplementary Table S3: Identification of genes in frequently gained/amplified chromosome regions of RAB7 (Chromosome 3 - Cytoband q11.2-q29) in metastatic oral squamous cell carcinoma**

| Chromosome 3 Cytoband<br>q11.2-q29 | Gene Name                                                                                   |
|------------------------------------|---------------------------------------------------------------------------------------------|
| <i>ACAD9</i>                       | acyl-Coenzyme A dehydrogenase family, member 9                                              |
| <i>C3orf25</i>                     | chromosome 3 open reading frame 25                                                          |
| <i>C3orf27</i>                     | chromosome 3 open reading frame 27                                                          |
| <i>C3orf37</i>                     | chromosome 3 open reading frame 37                                                          |
| <i>C3orf47</i>                     | chromosome 3 open reading frame 47                                                          |
| <i>CCDC48</i>                      | coiled-coil domain containing 48                                                            |
| <i>CNBP</i>                        | CCHC-type zinc finger, nucleic acid binding protein                                         |
| <i>COPG</i>                        | coatamer protein complex, subunit gamma                                                     |
| <i>DNAJB8</i>                      | DnaJ (Hsp40) homolog, subfamily B, member 8                                                 |
| <i>GATA2</i>                       | GATA binding protein 2                                                                      |
| <i>GP9</i>                         | glycoprotein IX (platelet)                                                                  |
| <i>H1FOO</i>                       | H1 histone family, member O, oocyte-specific                                                |
| <i>H1FX</i>                        | H1 histone family, member X                                                                 |
| <i>IFT122</i>                      | intraflagellar transport 122 homolog (Chlamydomonas)                                        |
| <i>ISY1</i>                        | ISY1 splicing factor homolog (S. cerevisiae)                                                |
| <i>KIAA1257</i>                    | KIAA1257                                                                                    |
| <i>LOC90246</i>                    | hypothetical protein LOC90246                                                               |
| <i>MBD4</i>                        | methyl-CpG binding domain protein 4                                                         |
| <i>PLXND1</i>                      | plexin D1                                                                                   |
| <i>RAB43</i>                       | RAB43, member RAS oncogene family; hypothetical LOC100131426                                |
| <b><i>RAB7A</i></b>                | <b>RAB7A, member RAS oncogene family</b>                                                    |
| <i>RHO</i>                         | rhodopsin                                                                                   |
| <i>RPL32P3</i>                     | ribosomal protein L32 pseudogene 3                                                          |
| <i>RPN1</i>                        | ribophorin I                                                                                |
| <i>SNORA7B</i>                     | small nucleolar RNA, H/ACA box 7A; small nucleolar RNA, H/ACA box 7B; ribosomal protein L32 |

**Supplementary Table S4: Identification of genes in frequently gained/amplified chromosome regions of RAB11(Chromosome 8 - Cytoband p23.3-p11.1) in metastatic oral squamous cell carcinoma**

| Chromosome 8 Cytoband p23.3-p11.1 | Gene Name                                                                      |
|-----------------------------------|--------------------------------------------------------------------------------|
| <i>ADRB3</i>                      | adrenergic, beta-3-, receptor                                                  |
| <i>ASH2L</i>                      | ash2 (absent, small, or homeotic)-like (Drosophila)                            |
| <i>BAG4</i>                       | BCL2-associated athanogene 4                                                   |
| <i>BRF2</i>                       | BRF2, subunit of RNA polymerase III transcription initiation factor, BRF1-like |
| <i>C8orf86</i>                    | chromosome 8 open reading frame 86                                             |
| <i>DDHD2</i>                      | DDHD domain containing 2                                                       |
| <i>EIF4EBP1</i>                   | eukaryotic translation initiation factor 4E binding protein 1                  |
| <i>ERLIN2</i>                     | ER lipid raft associated 2                                                     |
| <i>FGFR1</i>                      | fibroblast growth factor receptor 1                                            |
| <i>GOT1L1</i>                     | glutamic-oxaloacetic transaminase 1-like 1                                     |
| <i>GPR124</i>                     | G protein-coupled receptor 124                                                 |
| <i>LETM2</i>                      | leucine zipper-EF-hand containing transmembrane protein 2                      |
| <i>LOC728024</i>                  | hCG1640171                                                                     |
| <i>LSM1</i>                       | LSM1 homolog, U6 small nuclear RNA associated (S. cerevisiae)                  |
| <i>PPAPDC1B</i>                   | phosphatidic acid phosphatase type 2 domain containing 1B                      |
| <i>PROSC</i>                      | proline synthetase co-transcribed homolog (bacterial)                          |
| <b><i>RAB11</i></b>               | RAB11 family interacting protein 1 (class I)                                   |
| <i>RNF5P1</i>                     | ring finger protein 5; ring finger protein 5 pseudogene 1                      |
| <i>STAR</i>                       | steroidogenic acute regulatory protein                                         |
| <i>WHSC1L1</i>                    | Wolf-Hirschhorn syndrome candidate 1-like 1                                    |

**Supplementary Table S5: Cross-referenced of the 72-RAB cluster genes with list of differentially expressed genes in Oral Squamous Cell Carcinoma, retrieved from the data collected and processed at the NCBI-GEO database (<http://www.ncbi.nlm.nih.gov/geo/>) originated from ten studies reported in the literature.** It was considered a  $p < 0.05$  as significant. Protein type was classified as GEFs (guanine nucleotide exchange factors), GAPs (GTPase activating proteins) and effector proteins

| RAB central | Gene partner | Gene Name                                                         | Protein type | <sup>1</sup> Sheu et al. 2013 | <sup>2</sup> Sumino et al. 2013 | <sup>3</sup> Reis et al. 2011 | <sup>4</sup> Chen et al. 2008 | <sup>5</sup> Ambatipudi et al. 2012 | <sup>6</sup> Estilo et al. 2011 | <sup>7</sup> Sticht et al. 2008 | <sup>8</sup> Ye et al. 2008 | <sup>9</sup> Toruner et al. 2004 | <sup>10</sup> O'Donnell et al. 2005 |
|-------------|--------------|-------------------------------------------------------------------|--------------|-------------------------------|---------------------------------|-------------------------------|-------------------------------|-------------------------------------|---------------------------------|---------------------------------|-----------------------------|----------------------------------|-------------------------------------|
| RAB11A      | GNB1         | Guanine nucleotide binding protein (G protein)                    | Eff          | -0.09                         |                                 | 0.06                          | 0.14                          | 12.11                               | 0.81                            | -0.08                           | 0.24                        | 0.42                             |                                     |
| RAB11A      | PIK3R1       | Phosphoinositide-3-kinase, regulatory subunit 1                   | GAP          | 0.89                          |                                 | -0.27                         | -0.05                         | 8.57                                | -1.08                           | -0.48                           |                             | 0.48                             |                                     |
| RAB11A      | MYO5A        | Myosin VA                                                         | Eff          | -0.53                         |                                 | 0.22                          | 0.55                          | 19.57                               | 2.41                            |                                 | 0.28                        | 0.65                             |                                     |
| RAB11A      | RAB11FIP1    | RAB11 family interacting protein 1                                | Eff          | 0.63                          |                                 | -0.25                         | -0.14                         | -11.42                              |                                 | -0.40                           | -0.15                       | -1.00                            |                                     |
| RAB5A       | ALS2CL       | ALS2 C-terminal like                                              | GEF          | -0.86                         |                                 | -0.41                         | -0.31                         | -7.04                               |                                 | 81.66                           | -0.17                       | -0.86                            |                                     |
| RAB5A       | RIN1         | Ras and Rab interactor 1                                          | GEF          | -0.91                         |                                 |                               | 0.05                          | 9.01                                | 1.03                            | 0.12                            | 0.03                        | -0.69                            |                                     |
| RAB5A       | RIN2         | Ras and Rab interactor 2                                          | GEF          | -0.13                         |                                 | 0.08                          | 0.14                          |                                     | 1.37                            | -7.00                           | 0.16                        | 1.43                             |                                     |
| RAB5A       | CAV1         | Caveolin 1, caveolae protein                                      | Eff          | -0.32                         |                                 | 0.11                          | 0.29                          | -37.92                              | 1.09                            | -0.39                           | 0.12                        |                                  |                                     |
| RAB5A       | PIK3R4       | Phosphoinositide-3-kinase, regulatory subunit 4                   | Eff          | -0.67                         |                                 | 0.07                          | 0.08                          |                                     | 0.50                            | -0.14                           | 0.04                        | 1.01                             |                                     |
| RAB7A       | OSBPL1A      | Oxysterol binding protein-like 1A                                 | Eff          | 0.45                          |                                 | -0.13                         | -0.12                         | 5.19                                | -0.98                           | -0.23                           | -0.12                       |                                  |                                     |
| RAB7A       | PSMA7        | Proteasome (prosome, macropain) subunit, alpha type, 7            | Eff          |                               |                                 | 0.07                          | 0.06                          | 27.87                               | -0.38                           | -0.60                           | 0.20                        | 0.42                             |                                     |
| RAB11A      | ARHGAP1      | Rho gtpase activating protein 1                                   | Eff          | -0.23                         |                                 | 0.04                          | 0.07                          |                                     | 0.76                            | -1.15                           | -0.06                       |                                  |                                     |
| RAB11A      | MYO5B        | Myosin VB                                                         | Eff          | 0.82                          |                                 | -0.31                         | -0.31                         | 11.80                               |                                 | 0.40                            | -0.11                       |                                  |                                     |
| RAB11A      | RAB11FIP5    | RAB11 family interacting protein 5                                | Eff          | -0.39                         |                                 | 0.03                          | 0.10                          | -23.07                              |                                 | 0.08                            | 0.04                        |                                  |                                     |
| RAB11A      | TRPV6        | Ransient receptor potential cation channel, subfamily V, member 6 | Eff          | 3.40                          |                                 | -0.05                         | -0.05                         | 102.14                              | -1.11                           |                                 | -0.13                       |                                  |                                     |
| RAB5A       | LRRK2        | Leucine-rich repeat kinase 2                                      | Eff          | 1.64                          |                                 | -0.41                         | -0.45                         | -17.80                              |                                 | 0.20                            | -0.15                       |                                  |                                     |
| RAB5A       | RUFY1        | RUN and FYVE domain containing 1                                  | Eff          | 0.23                          |                                 | -0.08                         | -0.09                         | -15.76                              |                                 | 0.24                            | -0.10                       |                                  |                                     |
| RAB5A       | SDC1         | Syndecan 1                                                        | Eff          | -0.26                         |                                 |                               | -0.06                         |                                     | 1.18                            | -1.15                           | 0.11                        | -1.32                            |                                     |
| RAB5A       | ZFYVE20      | Zinc finger, FYVE domain containing 20                            | Eff          | 0.20                          |                                 | -0.01                         | -0.03                         | 4.69                                |                                 | 0.29                            | -0.06                       |                                  |                                     |
| RAB7A       | FYCO1        | FYVE and coiled-coil domain containing 1                          | Eff          | 1.21                          |                                 | -0.21                         | -0.15                         | -8.71                               |                                 | -0.10                           | -0.18                       |                                  |                                     |
| RAB7A       | VPS26A       | Vacuolar protein sorting 26                                       | Eff          | 0.16                          |                                 | -0.03                         | -0.04                         | 56.49                               | 0.54                            | 0.19                            |                             |                                  |                                     |
| RAB11A      | AKAP10       | A kinase (PRKA) anchor protein 10                                 | Eff          |                               |                                 | 0.24                          | 0.11                          |                                     | 0.51                            | -0.20                           | -0.21                       |                                  |                                     |
| RAB11A      | PSEN1        | Presenilin 1                                                      | Eff          | -0.41                         |                                 | 0.06                          |                               |                                     | 0.40                            | 0.00                            | 0.08                        |                                  |                                     |
| RAB11A      | PSEN2        | Presenilin 2                                                      | Eff          | 0.17                          |                                 |                               | -0.14                         |                                     | -0.83                           | -0.52                           | -0.01                       |                                  |                                     |

(Continued)

| RAB central | Gene partner | Gene Name                                                                | Protein type | <sup>1</sup> Sheu et al. 2013 | <sup>2</sup> Sumino et al. 2013 | <sup>3</sup> Reis et al. 2011 | <sup>4</sup> Chen et al. 2008 | <sup>5</sup> Ambatipudi et al. 2012 | <sup>6</sup> Estilo et al. 2011 | <sup>7</sup> Sticht et al. 2008 | <sup>8</sup> Ye et al. 2008 | <sup>9</sup> Toruner et al. 2004 | <sup>10</sup> O'Donnell et al. 2005 |
|-------------|--------------|--------------------------------------------------------------------------|--------------|-------------------------------|---------------------------------|-------------------------------|-------------------------------|-------------------------------------|---------------------------------|---------------------------------|-----------------------------|----------------------------------|-------------------------------------|
| RAB11A      | RAB11FIP2    | RAB11 family interacting protein 2                                       | Eff          | 0.22                          |                                 | -0.03                         | -0.05                         |                                     | -0.51                           | -0.46                           |                             |                                  |                                     |
| RAB11A      | RAB3IP       | RAB3A interacting protein                                                | Eff          | -0.11                         |                                 |                               | 0.11                          | -391.29                             |                                 | -0.07                           | 0.18                        |                                  |                                     |
| RAB11A      | SMCHD1       | Structural maintenance of chromosomes flexible hinge domain containing 1 | Eff          |                               |                                 | 0.07                          | 0.10                          |                                     |                                 | 0.19                            | 0.08                        | 0.94                             |                                     |
| RAB11A      | TBXA2R       | Thromboxane A2 receptor                                                  | Eff          | -0.06                         | -0.57                           |                               | 0.01                          |                                     |                                 | -0.03                           |                             | -0.58                            |                                     |
| RAB5A       | ALS2         | Amyotrophic lateral sclerosis 2                                          | GEF          | 0.09                          |                                 |                               | 0.09                          | -14.23                              |                                 | 0.04                            | 0.09                        |                                  |                                     |
| RAB5A       | GAPVD1       | Gtpase activating protein and VPS9 domains 1                             | GEF          | 0.15                          |                                 |                               | -0.06                         |                                     | 0.59                            |                                 | -0.05                       | -0.71                            |                                     |
| RAB5A       | TSC2         | Tuberous sclerosis 2                                                     | GAP          | -0.75                         |                                 |                               |                               | -4.99                               |                                 | -0.11                           | 0.05                        | 1.11                             |                                     |
| RAB5A       | USP6NL       | USP6 N-terminal like                                                     | GAP          | 0.48                          |                                 | -0.21                         | -0.36                         | -72.45                              |                                 |                                 | -0.23                       |                                  |                                     |
| RAB5A       | AGTR1        | Angiotensin II receptor, type 1                                          | Eff          | 2.90                          |                                 | -0.33                         |                               | -8.79                               | -2.91                           | 0.16                            |                             |                                  |                                     |
| RAB5A       | EEA1         | Early endosome antigen 1                                                 | Eff          |                               |                                 | -0.12                         | -0.10                         | -5.95                               | -0.58                           |                                 | -0.12                       |                                  |                                     |
| RAB5A       | PIK3C3       | Phosphatidylinositol 3-kinase, catalytic subunit type 3                  | Eff          | 0.09                          |                                 |                               | -0.03                         | 110.05                              |                                 | -0.05                           | -0.13                       |                                  |                                     |
| RAB5A       | RABAC1       | Rab acceptor 1 (prenylated)                                              | Eff          | -0.39                         |                                 | 0.10                          | 0.09                          |                                     |                                 | -0.26                           | 0.05                        |                                  |                                     |
| RAB5A       | RABEP2       | Rabaptin, RAB gtpase binding effector protein 2                          | Eff          | -0.36                         |                                 |                               | -0.09                         | 11.11                               |                                 | -0.09                           | -0.03                       |                                  |                                     |
| RAB5A       | SDCBP        | Syndecan binding protein (syntenin)                                      | Eff          | -0.16                         |                                 |                               | 0.04                          | 9.28                                |                                 | -0.07                           |                             | 0.75                             |                                     |
| RAB5A       | VPS11        | Vacuolar protein sorting 11                                              | Eff          | 0.18                          |                                 | -0.08                         | -0.12                         |                                     |                                 | -0.17                           | -0.09                       |                                  |                                     |
| RAB7A       | VPS29        | Vacuolar protein sorting 29                                              | Eff          | 0.08                          | 0.37                            | -0.02                         | 0.08                          |                                     |                                 | -0.49                           |                             |                                  |                                     |
| RAB11A      | GNG2         | Guanine nucleotide binding protein                                       | Eff          | 0.38                          |                                 |                               | 0.01                          | 5.19                                |                                 |                                 | -0.11                       |                                  |                                     |
| RAB11A      | PI4KB        | Phosphatidylinositol 4-kinase                                            | Eff          |                               |                                 |                               | -0.01                         | -33.64                              |                                 |                                 | 0.04                        | -0.40                            |                                     |
| RAB5A       | RIN3         | Ras and Rab interactor 3                                                 | GEF          | -1.08                         |                                 |                               | 0.04                          |                                     |                                 | -0.30                           |                             | 0.49                             |                                     |
| RAB5A       | RASA1        | RAS p21 protein activator                                                | GAP          | -1.39                         |                                 |                               | -0.02                         |                                     | 0.61                            |                                 | 0.07                        |                                  |                                     |
| RAB5A       | APPL1        | Adaptor protein, phosphotyrosine interaction                             | Eff          |                               |                                 | -0.22                         | -0.18                         | -94.38                              |                                 |                                 | -0.23                       |                                  |                                     |
| RAB5A       | OCRL         | Oculocerebrorenal syndrome of Lowe                                       | Eff          | 0.11                          |                                 |                               | 0.03                          |                                     | -0.42                           |                                 |                             | -0.20                            |                                     |
| RAB5A       | PIK3CB       | Phosphatidylinositol-4,5-bisphosphate 3-kinase                           | Eff          | 0.13                          |                                 |                               | -0.08                         |                                     | -0.44                           | -0.17                           |                             |                                  |                                     |
| RAB5A       | RABEP1       | Rabaptin, RAB gtpase binding effector protein 1                          | Eff          |                               |                                 |                               | 0.13                          | -45.61                              | -0.33                           |                                 | 0.06                        |                                  |                                     |
| RAB7A       | RAC1         | Ras-related C3 botulinum toxin substrate 1                               | Eff          | -0.52                         |                                 |                               | -0.02                         |                                     | 0.74                            | 35.84                           |                             |                                  |                                     |

(Continued)

| RAB central | Gene partner | Gene Name                                              | Protein type | <sup>1</sup> Sheu et al. 2013 | <sup>2</sup> Sumino et al. 2013 | <sup>3</sup> Reis et al. 2011 | <sup>4</sup> Chen et al. 2008 | <sup>5</sup> Ambatipudi et al. 2012 | <sup>6</sup> Estilo et al. 2011 | <sup>7</sup> Sticht et al. 2008 | <sup>8</sup> Ye et al. 2008 | <sup>9</sup> Toruner et al. 2004 | <sup>10</sup> O'Donnell et al. 2005 |
|-------------|--------------|--------------------------------------------------------|--------------|-------------------------------|---------------------------------|-------------------------------|-------------------------------|-------------------------------------|---------------------------------|---------------------------------|-----------------------------|----------------------------------|-------------------------------------|
| RAB7A       | RILP         | Rab interacting lysosomal protein                      | Eff          | 0.14                          |                                 | -0.09                         | -0.07                         | 6.30                                |                                 |                                 |                             |                                  |                                     |
| RAB11A      | ADRB2        | Adrenoceptor beta 2, surface                           | Eff          | 0.11                          |                                 | -0.25                         |                               |                                     |                                 | -4.25                           |                             |                                  |                                     |
| RAB11A      | HOOK1        | Hook homolog 1                                         | Eff          |                               |                                 |                               | -0.06                         | 38.26                               |                                 |                                 |                             | -1.49                            |                                     |
| RAB11A      | PTGIR        | Prostaglandin I2 receptor (IP)                         | Eff          | -1.63                         |                                 |                               | 0.01                          |                                     |                                 | 0.01                            |                             |                                  |                                     |
| RAB11A      | RAB11FIP3    | RAB11 family interacting protein 3                     | Eff          |                               |                                 |                               | 0.07                          |                                     |                                 | 0.21                            |                             |                                  | 0.23                                |
| RAB5A       | RABGEF1      | RAB guanine nucleotide exchange factor 1               | GEF          | 0.18                          |                                 |                               |                               | 10.34                               |                                 | -0.04                           |                             |                                  |                                     |
| RAB5A       | ANKFY1       | Ankyrin repeat and FYVE domain containing 1            | Eff          | -0.20                         |                                 |                               | 0.05                          |                                     |                                 | -0.34                           |                             |                                  |                                     |
| RAB5A       | INPP5B       | Inositol polyphosphate-5-phosphatase                   | Eff          |                               |                                 |                               | -0.01                         |                                     | -0.44                           |                                 | -0.06                       |                                  |                                     |
| RAB5A       | MON1A        | MON1 homolog A                                         | Eff          |                               |                                 | -0.13                         |                               | 6.40                                |                                 | -0.05                           |                             |                                  |                                     |
| RAB5A       | NAE1         | NEDD8 activating enzyme E1 subunit 1                   | Eff          |                               |                                 |                               |                               | 17.91                               | 0.33                            |                                 |                             | 0.85                             |                                     |
| RAB5A       | SUN2         | Sad1 and UNC84 domain containing 2                     | Eff          |                               |                                 |                               | -0.11                         |                                     | -0.39                           |                                 | -0.09                       |                                  |                                     |
| RAB7A       | VPS39        | Vacuolar protein sorting 39 homolog                    | GEF          |                               | -0.53                           |                               |                               |                                     | -0.57                           | 0.19                            |                             |                                  |                                     |
| RAB7A       | RNF115       | Ring finger protein 115                                | Eff          |                               |                                 |                               | 0.05                          |                                     | -0.61                           |                                 |                             | 0.64                             |                                     |
| RAB7A       | VPS35        | Vacuolar protein sorting 35                            | Eff          |                               |                                 |                               | -0.03                         | -3.77                               |                                 | -0.18                           |                             |                                  |                                     |
| RAB11A      | TBC1D15      | TBC1 domain family, member 15                          | GAP          | 0.04                          |                                 |                               | 0.03                          |                                     |                                 |                                 |                             |                                  |                                     |
| RAB11A      | DENND5A      | DENN/MADD domain containing 5A                         | Eff          |                               |                                 |                               | 0.11                          | 7.95                                |                                 |                                 |                             |                                  |                                     |
| RAB11A      | EXOC6        | Exocyst complex component 6                            | Eff          | 0.68                          |                                 |                               |                               |                                     |                                 | 0.07                            |                             |                                  |                                     |
| RAB11A      | VPS33B       | Vacuolar protein sorting 33                            | Eff          | -0.09                         |                                 |                               | -0.08                         |                                     |                                 |                                 |                             |                                  |                                     |
| RAB11A      | ZFYVE27      | Zinc finger, FYVE domain containing 27                 | Eff          |                               |                                 |                               | 0.05                          |                                     |                                 | 0.27                            |                             |                                  |                                     |
| RAB5A       | TBC1D17      | TBC1 domain family, member 17                          | Eff          | -0.27                         |                                 |                               |                               | -14.34                              |                                 |                                 |                             |                                  |                                     |
| RAB7A       | CCZI         | Vacuolar protein trafficking and biogenesis associated | Eff          |                               |                                 |                               |                               | 14.10                               |                                 |                                 |                             | -0.44                            |                                     |
| RAB7A       | PCBP1        | Poly(rc) binding protein 1                             | Eff          |                               |                                 |                               | -0.03                         |                                     | -0.38                           |                                 |                             |                                  |                                     |

<sup>1</sup>Oncogene (2013)<sup>2</sup>Int J Cancer(2013)132(3):540–8<sup>3</sup>BMC Cancer (2011)11:437<sup>4</sup>Cancer Epidemiol Biomarkers Prev (2008)17(8):2152–62<sup>5</sup>Genes Chromosomes Cancer (2012)51(2):161–73<sup>6</sup>BMC Cancer (2009)12–9:11<sup>7</sup>Neoplasia(2008)10(5):462–70<sup>8</sup>BMC Genomics(2008)6–9:69<sup>9</sup>Cancer Genet Cytogenet(2004) 154(1):27–35<sup>10</sup>Oncogene (2005)10–24(7):1244–51

**Supplementary Table S6: Cross-referenced of the 61-RAB interacting protein obtained from protein-protein interaction databases: MINT ([mint.bio.uniroma2.it/mint/](http://mint.bio.uniroma2.it/mint/)), HPRD ([www.hprd.org](http://www.hprd.org)) and IntAct ([www.ebi.ac.uk/intact/](http://www.ebi.ac.uk/intact/)). The list of differentially expressed genes in Oral Squamous Cell Carcinoma was collected and processed at the NCBI-GEO database (<http://www.ncbi.nlm.nih.gov/geo/>) originated from ten studies reported in the literature. It was considered a  $p < 0.05$  as significant**

| RABcentral | RABs PPI Partner | Gene Name                                         | <sup>1</sup> Sheu et al. 2013 | <sup>2</sup> Sumino et al. 2013 | <sup>3</sup> Reis et al. 2011 | <sup>4</sup> Chen et al. 2008 | <sup>5</sup> Ambatipudi et al. 2012 | <sup>6</sup> Estilo et al. 2011 | <sup>7</sup> Sticht et al. 2008 | <sup>8</sup> Ye et al. 2008 | <sup>9</sup> Toruner et al. 2004 | <sup>10</sup> O'Donnell et al. 2005 |
|------------|------------------|---------------------------------------------------|-------------------------------|---------------------------------|-------------------------------|-------------------------------|-------------------------------------|---------------------------------|---------------------------------|-----------------------------|----------------------------------|-------------------------------------|
| RAB5A      | ALS2CL           | ALS2 C-terminal like                              | -0.86                         |                                 | -0.41                         | -0.42                         | -7.04                               |                                 | 0.07                            | -0.31                       | -0.86                            |                                     |
| RAB11A     | FTSJ1            | Ftsj RNA methyltransferase homolog 1              | -0.16                         |                                 | 0.07                          | 0.10                          |                                     | 0.54                            | 0.10                            | 0.10                        |                                  | -0.40                               |
| RAB5A      | PIK3R1           | Phosphoinositide-3-kinase, regulatory subunit 1   | 0.65                          |                                 | -0.27                         | -0.11                         | 8.57                                | -1.08                           | -14.64                          |                             | 0.48                             |                                     |
| RAB7A      | ATG5             | Autophagy related 5                               |                               |                                 | 0.05                          | 0.05                          | 12.69                               | -0.91                           | -0.08                           | 0.11                        | 0.70                             |                                     |
| RAB5A      | RIN2             | Ras and Rab interactor 2                          | -0.13                         |                                 | 0.08                          | 0.14                          |                                     | 1.37                            | -7.00                           | 0.16                        | 1.43                             |                                     |
| RAB11A     | MYO5A            | Myosin VA                                         | -0.53                         |                                 | 0.22                          | 0.55                          | 19.57                               | 2.41                            |                                 | 0.28                        | 0.65                             |                                     |
| RAB5A      | ITGB1            | Integrin, beta 1                                  | -0.25                         |                                 |                               | 0.12                          | -81.80                              | 0.92                            | -0.18                           | 0.18                        |                                  |                                     |
| RAB5A      | RAB5C            | RAB5C, member RAS oncogene family                 | -0.60                         |                                 | 0.12                          | 0.12                          | 155.61                              | 0.41                            | -0.11                           |                             |                                  |                                     |
| RAB7A      | CHM              | Choroideremia (Rab escort protein 1)              | -0.27                         |                                 | 0.06                          | 0.19                          | 4.27                                | -0.61                           |                                 | 0.02                        |                                  |                                     |
| RAB11A     | RAB11FIP1        | RAB11 family interacting protein 1 (class I)      | 0.37                          |                                 | -0.25                         | -0.30                         | -11.42                              |                                 | -0.40                           |                             | -1.00                            |                                     |
| RAB5A      | RIN1             | Ras and Rab interactor 1                          | -0.91                         |                                 |                               | 0.05                          | 9.01                                | 1.03                            | 0.12                            |                             | -0.69                            |                                     |
| RAB11A     | PPP2R1B          | Protein phosphatase 2, regulatory subunit A, beta | 0.57                          |                                 |                               | -0.04                         |                                     | 0.84                            | -0.09                           |                             |                                  | 0.37                                |
| RAB7A      | HLA-B            | Major histocompatibility complex, class I, B      |                               |                                 | 0.09                          | 0.13                          | -7.88                               |                                 | -0.58                           |                             | 2.19                             |                                     |
| RAB5A      | SDCBP            | Syndecan binding protein (syntenin)               | -0.16                         |                                 |                               | 0.04                          | 9.28                                |                                 | -0.07                           |                             | 0.75                             |                                     |
| RAB11A     | RAB11FIP2        | RAB11 family interacting protein 2 (class I)      | 0.22                          |                                 | -0.03                         | -0.05                         |                                     | -0.51                           | -0.46                           |                             |                                  |                                     |
| RAB5A      | CHML             | Choroideremia-like (Rab escort protein 2)         |                               |                                 | 0.24                          | 0.10                          | 10.70                               |                                 | 0.35                            |                             |                                  | 0.65                                |
| RAB7A      | GABARAPL2        | GABA(A) receptor-associated protein-like 2        | 0.29                          |                                 |                               | -0.04                         | -44.30                              | -0.36                           |                                 |                             | 0.43                             |                                     |
| RAB5A      | USP6NL           | USP6 N-terminal like                              | 0.48                          |                                 | -0.21                         | -0.74                         | -72.45                              |                                 |                                 | -0.23                       |                                  |                                     |
| RAB7A      | EIF1B            | Eukaryotic translation initiation factor 1B       | 0.17                          |                                 | -0.06                         |                               | 4.77                                | -0.36                           | -0.31                           |                             |                                  |                                     |
| RAB5A      | ALS2             | Amyotrophic lateral sclerosis 2 (juvenile)        | 0.09                          |                                 |                               | 0.09                          | -14.23                              |                                 | 0.04                            | 0.09                        |                                  |                                     |
| RAB11A     | GDI2             | GDP dissociation inhibitor 2                      | 0.05                          | 0.29                            |                               | -0.02                         |                                     | 0.56                            | -0.16                           |                             |                                  |                                     |
| RAB11A     | TBXA2R           | Thromboxane A2 receptor                           | -0.89                         | -0.57                           |                               | -0.02                         |                                     |                                 | -0.03                           |                             | -0.58                            |                                     |
| RAB7A      | MPG              | N-methylpurine-DNA glycosylase                    | -0.62                         | 0.30                            |                               | 0.04                          | 66.04                               |                                 | 0.07                            |                             |                                  |                                     |
| RAB5A      | ZFYVE20          | Zinc finger, FYVE domain containing 20            | 0.20                          |                                 | -0.01                         | -0.12                         | 4.69                                |                                 | 0.14                            |                             |                                  |                                     |
| RAB11A     | RAB11FIP5        | RAB11 family interacting protein 5 (class I)      | -0.39                         |                                 | 0.03                          | 0.10                          | -23.07                              |                                 | 0.08                            |                             |                                  |                                     |
| RAB11A     | MYO5B            | Myosin VB                                         | 0.82                          |                                 | -0.31                         | -0.46                         | 11.80                               |                                 | -2.42                           |                             |                                  |                                     |
| RAB5A      | AGTR1            | Angiotensin II receptor, type 1                   | 2.90                          |                                 | -0.33                         |                               | -8.79                               | -2.91                           | 0.16                            |                             |                                  |                                     |

(Continued)



| RABcentral | RABs PPI Partner | Gene Name                                          | <sup>1</sup> Sheu et al. 2013 | <sup>2</sup> Sumino et al. 2013 | <sup>3</sup> Reis et al. 2011 | <sup>4</sup> Chen et al. 2008 | <sup>5</sup> Ambatipudi et al. 2012 | <sup>6</sup> Estilo et al. 2011 | <sup>7</sup> Sticht et al. 2008 | <sup>8</sup> Ye et al. 2008 | <sup>9</sup> Toruner et al. 2004 | <sup>10</sup> O'Donnell et al. 2005 |
|------------|------------------|----------------------------------------------------|-------------------------------|---------------------------------|-------------------------------|-------------------------------|-------------------------------------|---------------------------------|---------------------------------|-----------------------------|----------------------------------|-------------------------------------|
| RAB5A      | OCRL             | Oculocerebrorenal syndrome of Lowe                 | 0.11                          |                                 |                               | 0.03                          |                                     | -0.42                           |                                 |                             | -0.20                            |                                     |
| RAB11A     | PPP2R1A          | Protein phosphatase 2, regulatory subunit A, alpha |                               | 0.32                            |                               | -0.04                         |                                     | 0.42                            | -0.18                           |                             |                                  |                                     |
| RAB7A      | RILP             | Rab interacting lysosomal protein                  | 0.14                          |                                 | -0.09                         | -0.07                         | 6.30                                |                                 |                                 |                             |                                  |                                     |
| RAB5A      | TSC2             | Tuberous sclerosis 2                               | -0.75                         |                                 |                               |                               | -4.99                               |                                 | -0.11                           |                             | 1.11                             |                                     |
| RAB5A      | RAB37            | RAB37, member RAS oncogene family                  | 0.90                          |                                 | 0.00                          |                               | 15.14                               |                                 | -0.19                           |                             |                                  |                                     |
| RAB11A     | TRAF6            | TNF receptor-associated factor 6                   | 0.19                          |                                 |                               | -0.08                         | -7.91                               |                                 | 0.27                            |                             |                                  |                                     |
| RAB5A      | EEA1             | Early endosome antigen 1                           |                               |                                 | -0.12                         | -0.11                         | -5.95                               | -0.58                           |                                 |                             |                                  |                                     |
| RAB11A     | PSEN2            | Presenilin 2 (Alzheimer disease 4)                 | 0.17                          |                                 |                               | -0.14                         |                                     | -0.83                           | -0.52                           |                             |                                  |                                     |
| RAB5A      | RABAC1           | Rab acceptor 1 (prenylated)                        | -0.39                         |                                 | 0.10                          | 0.09                          |                                     |                                 | -0.26                           |                             |                                  |                                     |
| RAB5A      | TM9SF4           | Transmembrane 9 superfamily protein member 4       |                               |                                 | 0.10                          | 0.09                          |                                     | 0.62                            | 0.05                            |                             |                                  |                                     |
| RAB11A     | ME2              | Malic enzyme 2, NAD(+)-dependent, mitochondrial    |                               |                                 |                               | 0.08                          | 12.98                               |                                 | 0.06                            |                             | 1.27                             |                                     |
| RAB7A      | GABARAPL1        | GABA(A) receptor-associated protein like 1         | 0.30                          |                                 |                               |                               |                                     | -1.23                           | -0.24                           |                             | 1.54                             |                                     |
| RAB5A      | GDI1             | GDP dissociation inhibitor 1                       | -0.36                         |                                 | 0.08                          | 0.10                          | -3.02                               |                                 |                                 |                             |                                  |                                     |
| RAB11A     | VPS24            | (CHMP3)charged multivesicular body protein 3       | 0.12                          |                                 | -0.04                         | -0.10                         |                                     |                                 | -1.58                           |                             |                                  |                                     |
| RAB11A     | STX4             | Syntaxin 4                                         |                               |                                 | 0.06                          | 0.06                          | -1.82                               | 0.31                            |                                 |                             |                                  |                                     |
| RAB11A     | RABGGTB          | Rab geranylgeranyltransferase, beta subunit        | 0.40                          |                                 | -0.03                         | -0.03                         | -17.75                              |                                 |                                 |                             |                                  |                                     |
| RAB11A     | PSEN1            | Presenilin 1                                       | -0.59                         |                                 | 0.06                          |                               |                                     | 0.40                            | -0.35                           |                             |                                  |                                     |
| RAB7A      | DNM2             | Dynamain 2                                         | -0.29                         |                                 |                               | -0.06                         |                                     |                                 | 0.08                            |                             |                                  |                                     |
| RAB11A     | VHL              | Von Hippel-Lindau tumor suppressor                 | -0.32                         |                                 |                               |                               |                                     | -0.62                           | -0.02                           |                             |                                  |                                     |
| RAB11A     | CHMP1B           | Charged multivesicular body protein 1B             |                               |                                 | 0.07                          | 0.04                          | -18.39                              |                                 |                                 |                             |                                  |                                     |
| RAB5A      | VPS45            | Vacuolar protein sorting 45 homolog                |                               |                                 |                               | -0.03                         |                                     | -0.63                           |                                 |                             | 0.78                             |                                     |
| RAB7A      | RNF115           | Ring finger protein 115                            |                               |                                 |                               | -0.01                         |                                     | -0.61                           |                                 |                             | 0.64                             |                                     |
| RAB5A      | RABEP1           | Rabaptin, RAB gtpase binding effector protein 1    |                               |                                 |                               | 0.10                          | -45.61                              | -0.33                           |                                 |                             |                                  |                                     |
| RAB7A      | ATG9A            | Autophagy related 9A                               | -0.86                         |                                 |                               |                               |                                     | -0.26                           | -0.04                           |                             |                                  |                                     |
| RAB7A      | SH3KBP1          | SH3-domain kinase binding protein 1                | -0.19                         |                                 |                               | 0.22                          |                                     |                                 | 0.08                            |                             |                                  |                                     |
| RAB5A      | APPL1            | Adaptor protein, phosphotyrosine interaction       |                               |                                 | -0.22                         | -0.22                         | -94.38                              |                                 |                                 |                             |                                  |                                     |
| RAB11A     | DTNBP1           | Dystrobrevin binding protein 1                     | -0.29                         |                                 |                               | 0.09                          |                                     |                                 | -0.08                           |                             |                                  |                                     |
| RAB5A      | RASA1            | RAS p21 protein activator                          | -1.39                         |                                 |                               | -0.02                         |                                     | 0.61                            |                                 |                             |                                  |                                     |
| RAB11A     | RAB11FIP3        | RAB11 family interacting protein 3                 |                               |                                 |                               | 0.06                          |                                     |                                 | -0.06                           |                             |                                  | 0.23                                |
| RAB5A      | VPS35            | Vacuolar protein sorting 35                        |                               |                                 |                               | -0.05                         | -3.77                               |                                 | -0.18                           |                             |                                  |                                     |
| RAB7A      | SLC2A4           | Solute carrier family 2                            | 0.15                          |                                 |                               |                               | 36.28                               | -1.83                           |                                 |                             |                                  |                                     |

(Continued)

| RABcentral    | RABs PPI Partner | Gene Name                                                   | <sup>1</sup> Sheu et al. 2013 | <sup>2</sup> Sumino et al. 2013 | <sup>3</sup> Reis et al. 2011 | <sup>4</sup> Chen et al. 2008 | <sup>5</sup> Ambatipudi et al. 2012 | <sup>6</sup> Estilo et al. 2011 | <sup>7</sup> Sticht et al. 2008 | <sup>8</sup> Ye et al. 2008 | <sup>9</sup> Toruner et al. 2004 | <sup>10</sup> O'Donnell et al. 2005 |
|---------------|------------------|-------------------------------------------------------------|-------------------------------|---------------------------------|-------------------------------|-------------------------------|-------------------------------------|---------------------------------|---------------------------------|-----------------------------|----------------------------------|-------------------------------------|
| <i>RAB7A</i>  | <i>MCC</i>       | Mutated in colorectal cancers                               | -0.21                         |                                 |                               | 0.17                          |                                     |                                 |                                 |                             |                                  |                                     |
| <i>RAB11A</i> | <i>ZFYVE27</i>   | Zinc finger, FYVE domain containing 27                      |                               |                                 |                               | 0.05                          |                                     |                                 | 0.10                            |                             |                                  |                                     |
| <i>RAB7A</i>  | <i>PRKAB1</i>    | Protein kinase, AMP-activated, beta 1 non-catalytic subunit |                               |                                 |                               | -0.15                         |                                     |                                 | -0.09                           |                             |                                  |                                     |

<sup>1</sup>Oncogene (2013)

<sup>2</sup>Int J Cancer(2013)132(3):540–8

<sup>3</sup>BMC Cancer (2011)11:437

<sup>4</sup>Cancer Epidemiol Biomarkers Prev (2008)17(8):2152–62

<sup>5</sup>Genes Chromosomes Cancer (2012)51(2):161–73

<sup>6</sup>BMC Cancer (2009)12–9:11

<sup>7</sup>Neoplasia(2008)10(5):462–70

<sup>8</sup>BMC Genomics(2008)6–9:69

<sup>9</sup>Cancer Genet Cytogenet(2004) 154(1):27–35

<sup>10</sup>Oncogene (2005)10–24(7):1244–51
